# Supplementary material
Source: PubMed Central journal article supplement (PMC7542836)
Supplement: ao0c03386_si_001.pdf [file ao0c03386_si_001.pdf]

# Pyridine and thiazole based hydrazides with promising anti-inflammatory and antimicrobial activities along with their *in silico* studies

Vinuta Kamat<sup>a</sup>, Rangappa Santosh<sup>a</sup>, Boja Poojary<sup>a\*</sup>, Suresh P. Nayak<sup>a</sup>, Banoth Karan Kumar<sup>b</sup>, Murugesan Sankaranarayanan<sup>b</sup>, Faheem<sup>b</sup>, Sheela Khanapure<sup>c</sup>, Delicia Avilla Barretto<sup>c</sup>, Shyam K. Vootla<sup>c</sup>

<sup>a</sup>Department of Post-Graduate Studies & Research in Chemistry, Mangalore University, Mangalagangothri-574199, Dakshina Kannada, Karnataka, India.

Tel.: +91-824-2287262(O); fax: +91-824-2287367/2287424.

<sup>b</sup>Medicinal Chemistry Research Laboratory, Department of Pharmacy, Birla Institute of Technology and Science, Pilani, Pilani Campus, Rajasthan-333031, India.

<sup>c</sup>Department of Biotechnology and Microbiology, Karnataka University, Dharwad-580003, Karnataka, India.

\*Author for correspondence: [bojapoojary@gmail.com](mailto:bojapoojary@gmail.com)

## Table of content

### 1. Spectral data

- 1.1. IR spectra of **5b**, **5d** and **5h** - Figure S1 - 3.
- 1.2. <sup>1</sup>H NMR spectra **5a**, and **5b** - Figure S4, 5.
- 1.3. <sup>13</sup>C NMR spectra of **5a**, and **5b** - Figure S6, 7.
- 1.4. ES-MS spectra of compounds **5b**, **5d** and **5h** - Figure S8 - 10.

### 2. Figures S11-S12

Figures S11-S12 are graphical representations of results of the antibacterial and antifungal evaluation of the compounds.

## 1. Spectral data

### 1.1. IR spectra of compounds 5b, 5d and 5h.

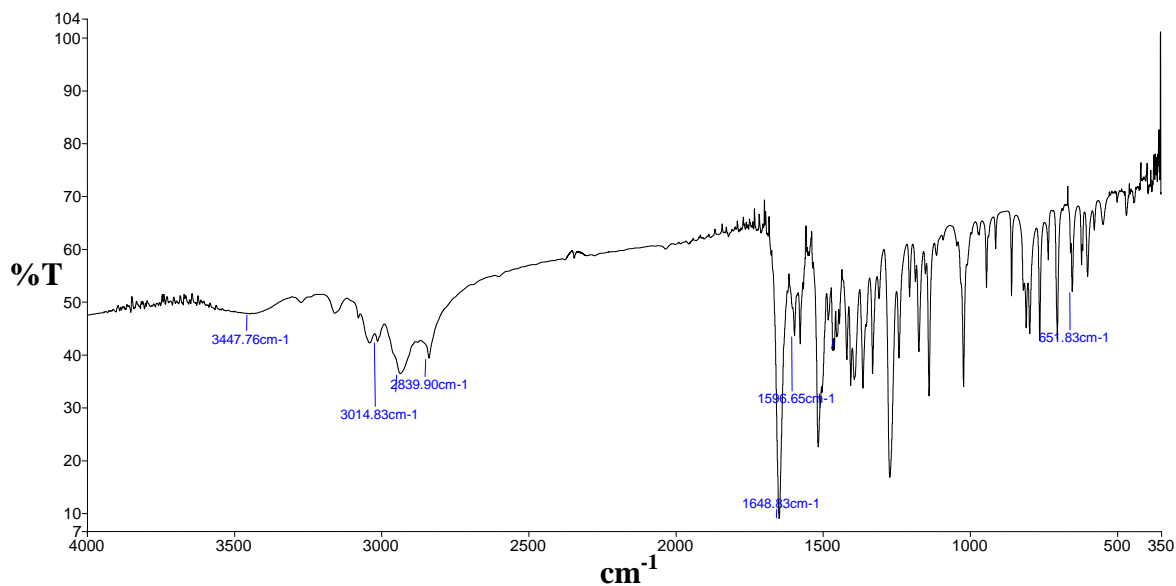

**Figure S1.** IR Spectrum of *N'*-(3,4-dimethoxybenzylidene)-5-methyl-2-(pyridin-3-yl)thiazole-4-carbohydrazide (5b).

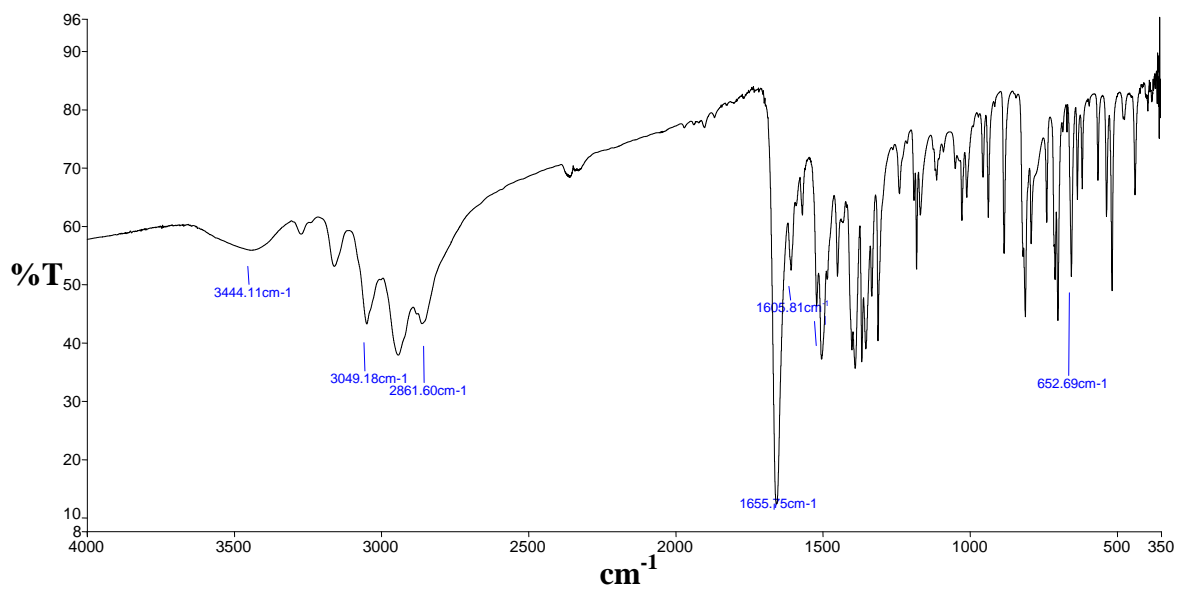

**Figure S2.** IR Spectrum of **5-Methyl-N'-(4-methylbenzylidene)-2-(pyridin-3-yl)thiazole-4-carbohydrazide (5d)**.

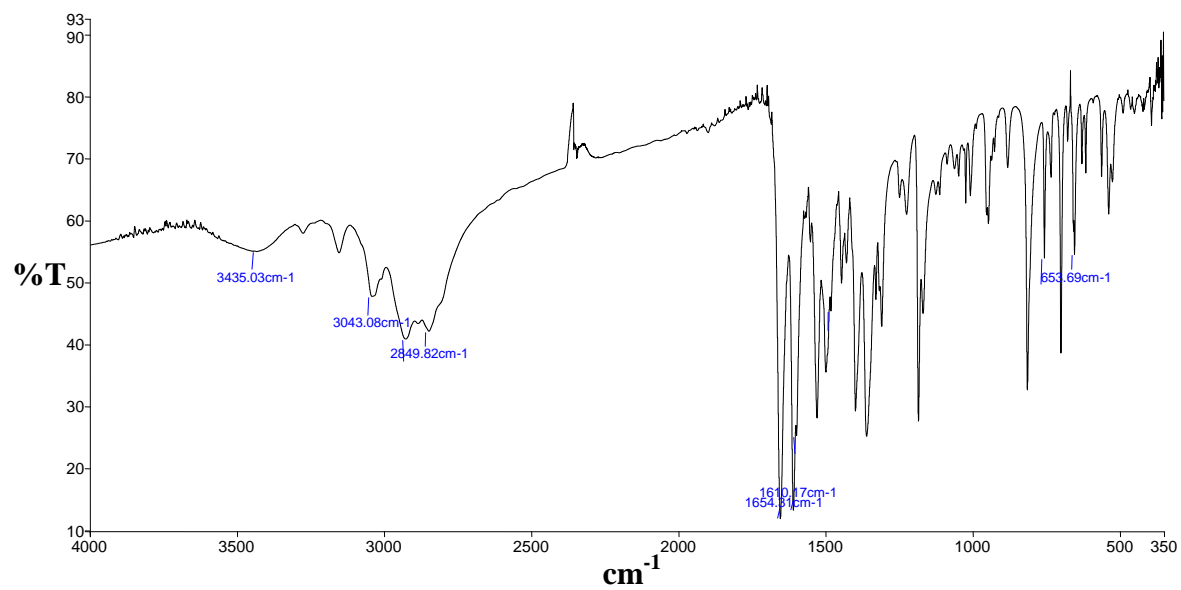

**Figure S3.** IR Spectrum of *N'*-(4-dimethylaminobenzylidene)-5-methyl-2-(pyridine-3-yl)thiazole-4-carbohydrazide (5h).

## 1.2. $^1\text{H}$ NMR spectra of compounds 5a and 5b.

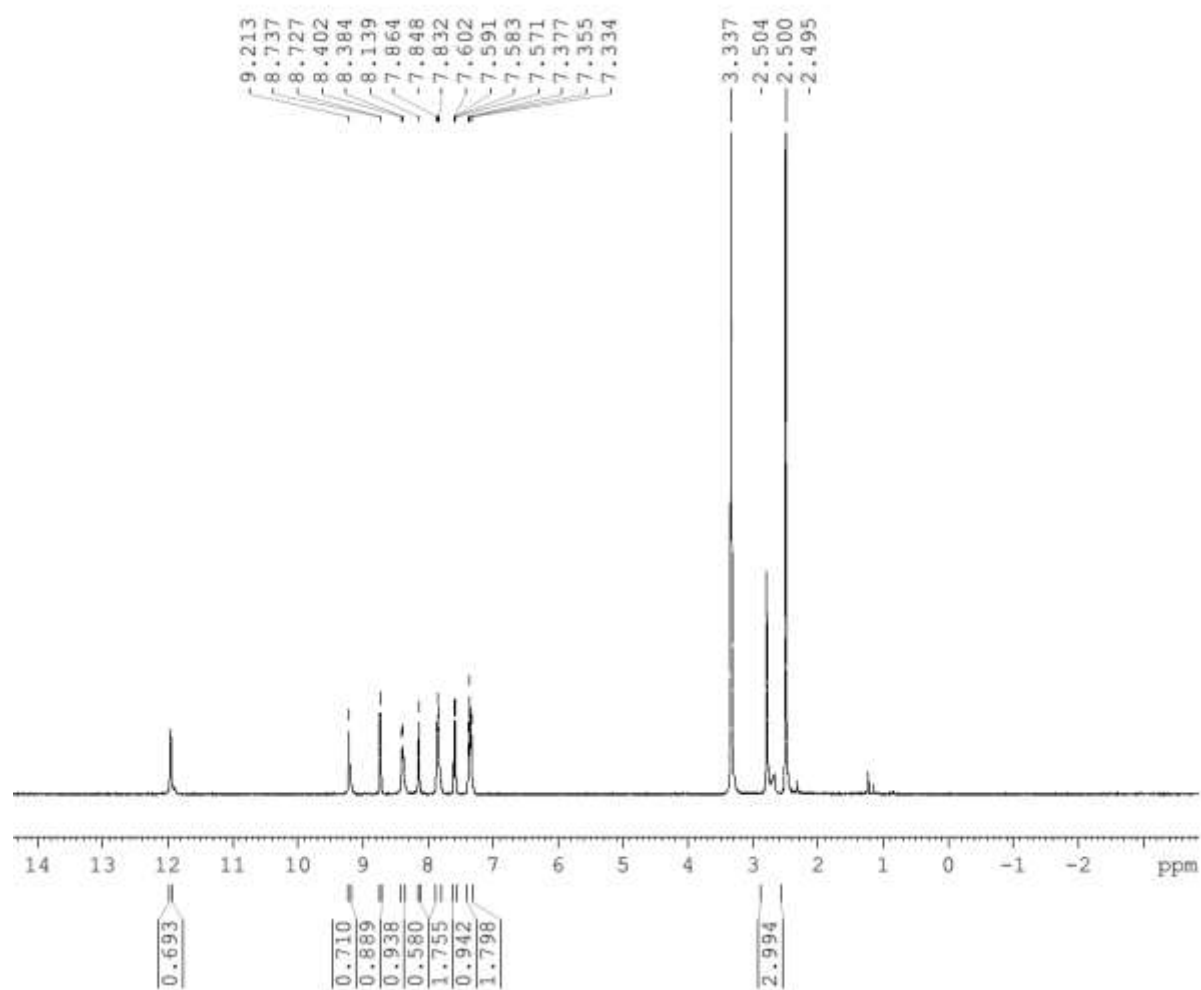

**Figure S4.**  $^1\text{H}$  NMR spectrum of *N'*-(4-chlorobenzylidene)-5-methyl-2-(pyridin-3-yl)thiazole-4-carbohydrazide (5a).

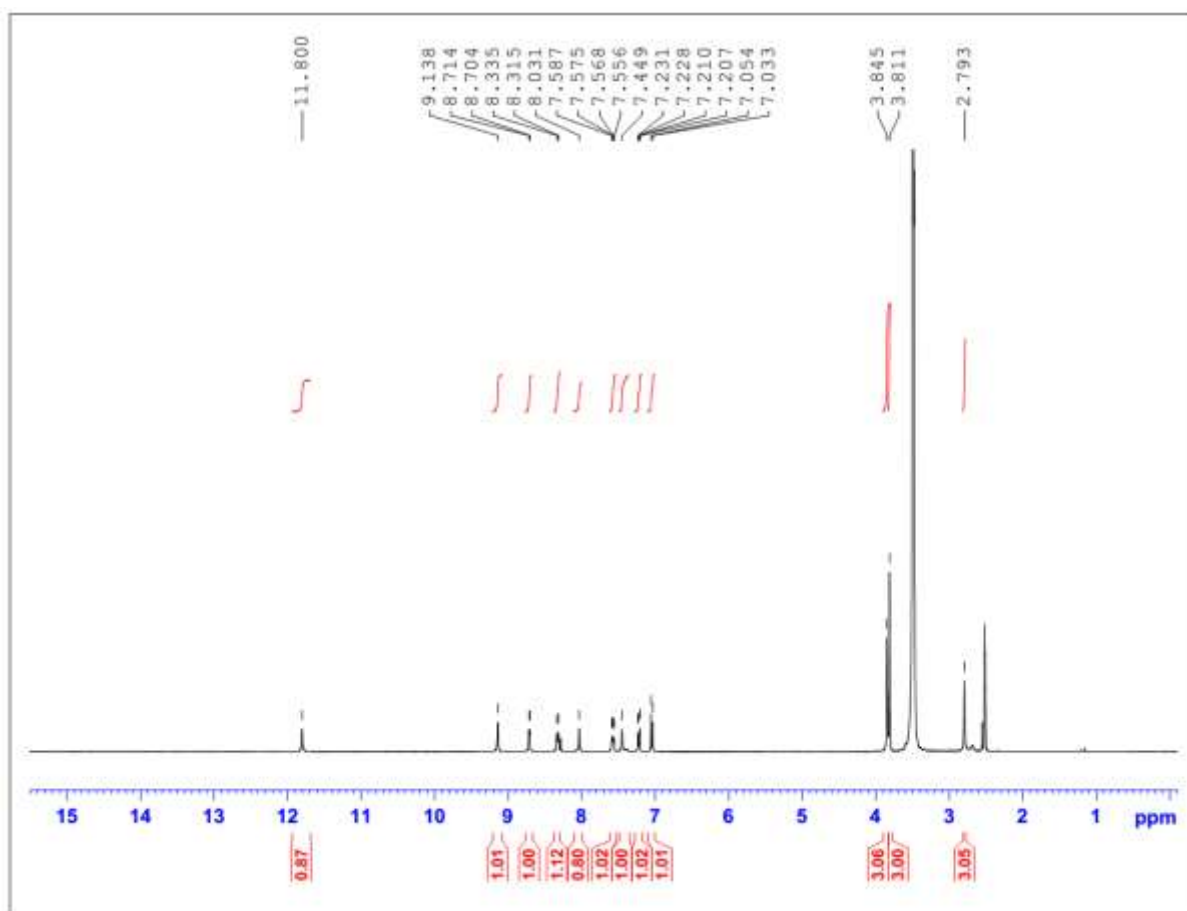

Figure S5.  $^1\text{H}$  NMR spectrum of *N'*-(3,4-dimethoxybenzylidene)-5-methyl-2-(pyridin-3-yl)thiazole-4-carbohydrazide (5b).

### 1.3. $^{13}\text{C}$ NMR spectra of compounds 5a and 5b.

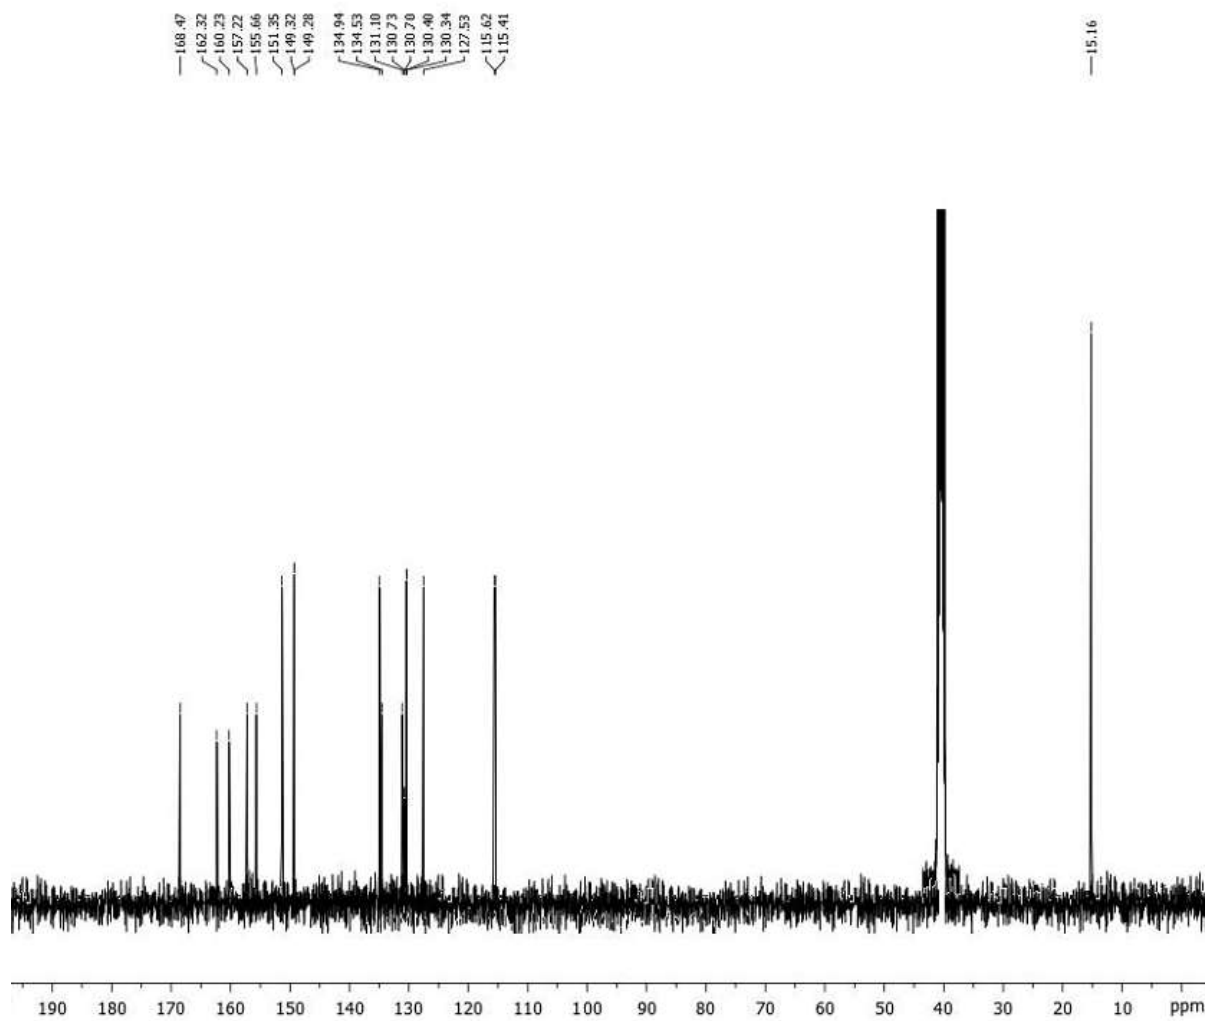

Figure S6.  $^{13}\text{C}$  NMR spectrum of *N'*-(4-chlorobenzylidene)-5-methyl-2-(pyridin-3-yl)thiazole-4-carbohydrazide (5a).

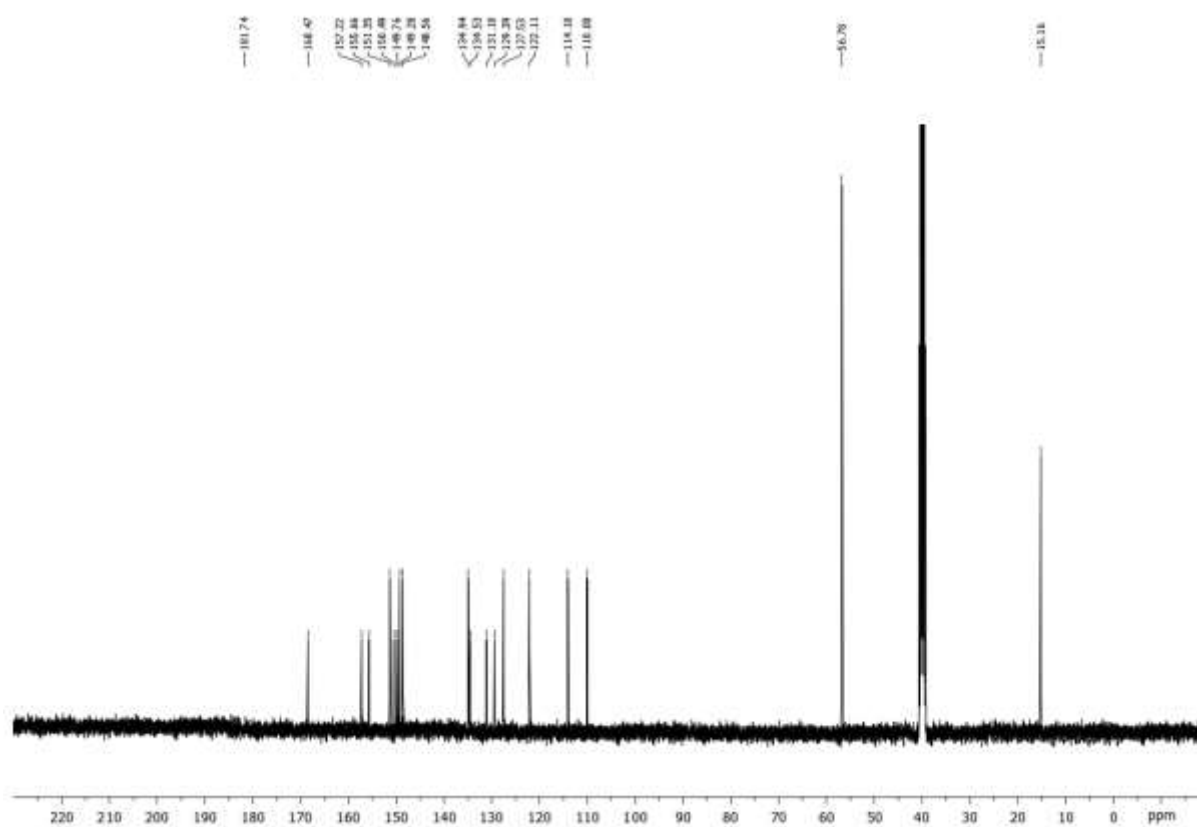

Figure S7.  $^{13}\text{C}$  NMR spectrum of  $N'$ -(3,4-dimethoxybenzylidene)-5-methyl-2-(pyridin-3-yl)thiazole-4-carbohydrazide (5b).



#### 1.4. ES-MS spectra of compounds 5b, 5d and 5h

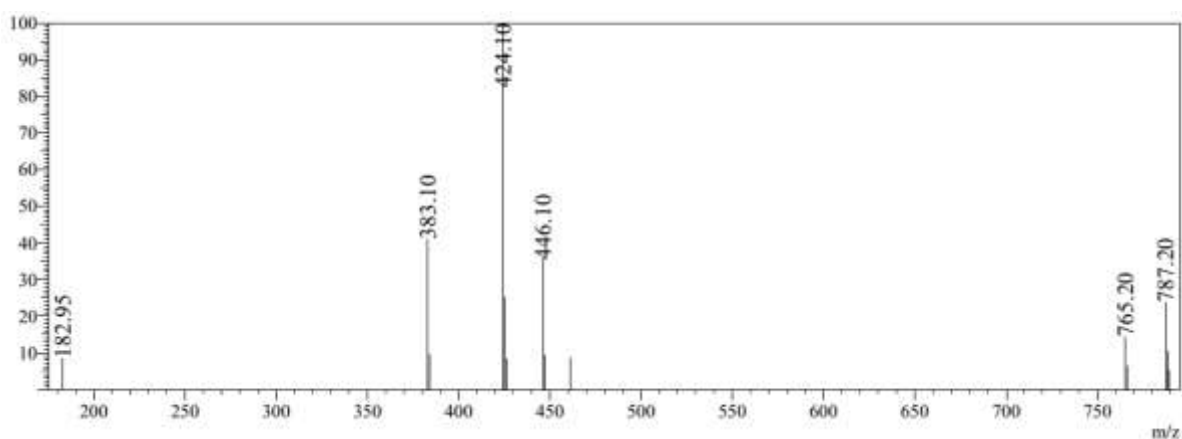

Figure S8. ES-Mass spectrum of *N'*-(3,4-dimethoxybenzylidene)-5-methyl-2-(pyridin-3-yl)thiazole-4-carbohydrazide (5b).

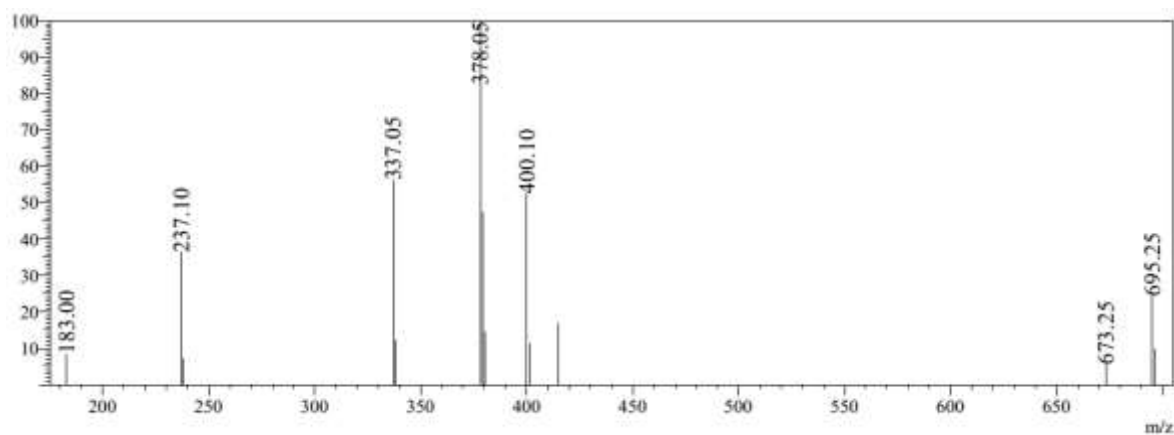

Figure S9. ES-Mass spectrum of 5-Methyl-*N'*-(4-methylbenzylidene)-2-(pyridin-3-yl)thiazole-4-carbohydrazide (5d).

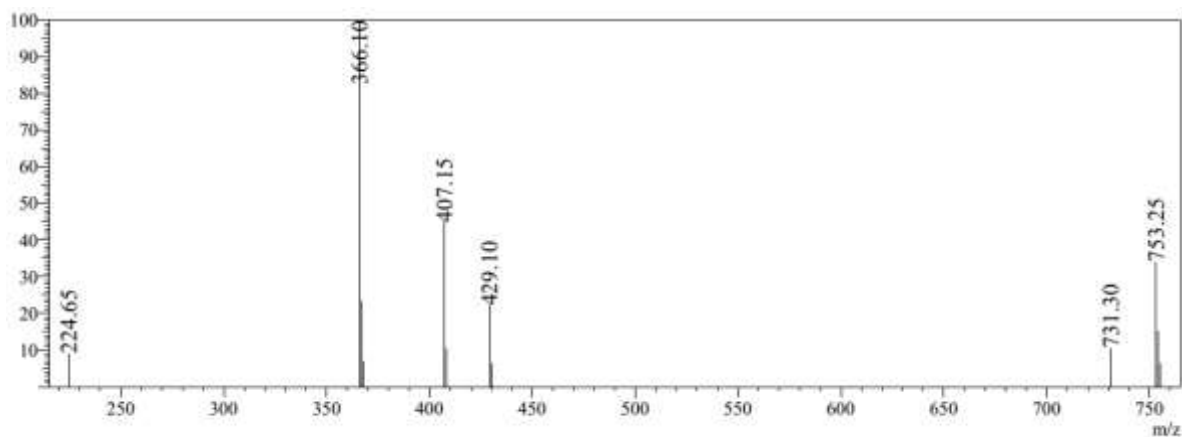

Figure S10. ES-Mass spectrum of *N'*-(4-dimethylaminobenzylidene)-5-methyl-2-(pyridine-3-yl)thiazole-4-carbohydrazide (5h).

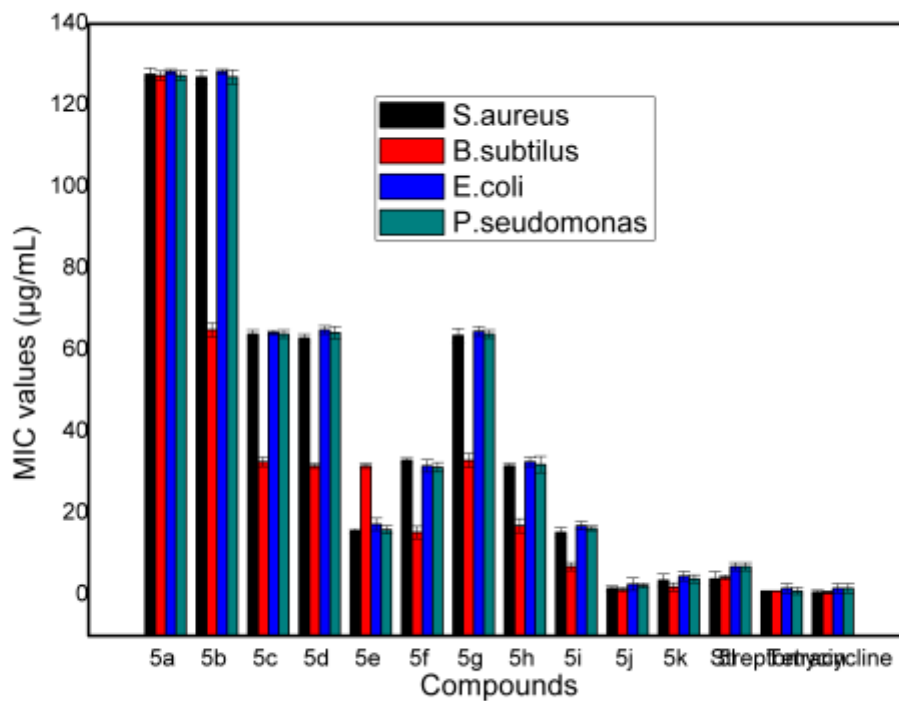

**Figure S11:** Graphical representation of results of the anti-bacterial evaluation of the compounds

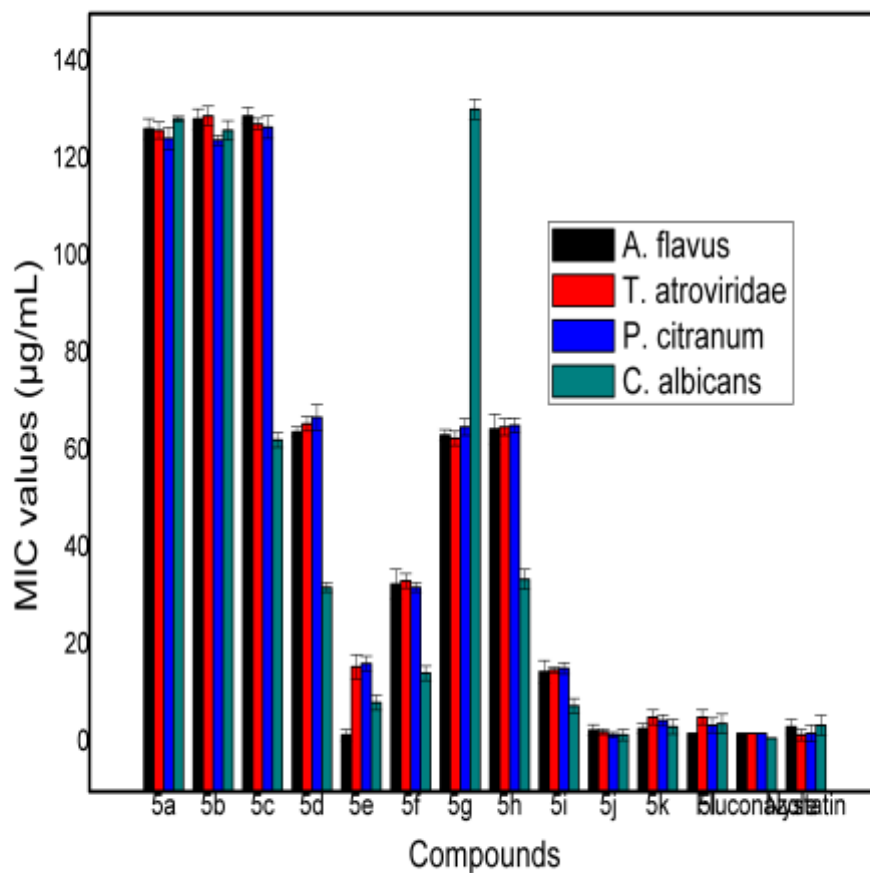

**Figure S12:** Graphical representation of results of the antifungal evaluation of the compounds
